# Supplementary material for: A new cholesterol-naphthalimide conjugate: aggregation and sensing of CN− and CO2 under different conditions
Source: Royal Society of Chemistry journal article supplement (doi:10.1039/d3nj00767g), 2023-01-01
Supplement: d3nj00767g1.pdf [file d3nj00767g1.pdf]

## Supporting Information

### A new cholesterol-naphthalimide conjugate: Aggregation and sensing of CN<sup>-</sup> and CO<sub>2</sub> under different conditions

Rameez Raza, Chiranjit Pati, Nabajyoti Baildya and Kumares Ghosh\*

*Department of Chemistry, University of Kalyani, Kalyani-741235, India.  
Email: [ghosh\\_k2003@yahoo.co.in](mailto:ghosh_k2003@yahoo.co.in); [kumareschem18@klyuniv.ac.in](mailto:kumareschem18@klyuniv.ac.in)*

**Table S1.** Results of gelation test for compound **1**.

| Solvent                                        | <b>1</b>                                      |
|------------------------------------------------|-----------------------------------------------|
| DMSO                                           | S                                             |
| DMF                                            | <b>G (50 mg/mL), (T<sub>gel</sub>= 36 °C)</b> |
| CH <sub>3</sub> CN                             | PS                                            |
| THF                                            | S                                             |
| CHCl <sub>3</sub>                              | S                                             |
| MeOH                                           | I                                             |
| Toluene                                        | PS                                            |
| Benzene                                        | PS                                            |
| DMSO-H <sub>2</sub> O (1:1, v/v)               | P                                             |
| DMF-H <sub>2</sub> O (1:1, v/v)                | P                                             |
| CH <sub>3</sub> CN-H <sub>2</sub> O (1:1, v/v) | P                                             |
| DMF-MeOH (1:1, v/v)                            | <b>G (10 mg/mL), (T<sub>gel</sub>= 54 °C)</b> |
| 1,4-Dioxane                                    | PS                                            |
| 1,4-Dioxane-H <sub>2</sub> O (1:1, v/v)        | P                                             |
| Hexane                                         | I                                             |

S = Solution; I = Insoluble; PS = Partially soluble; P = Precipitation, G= Gel

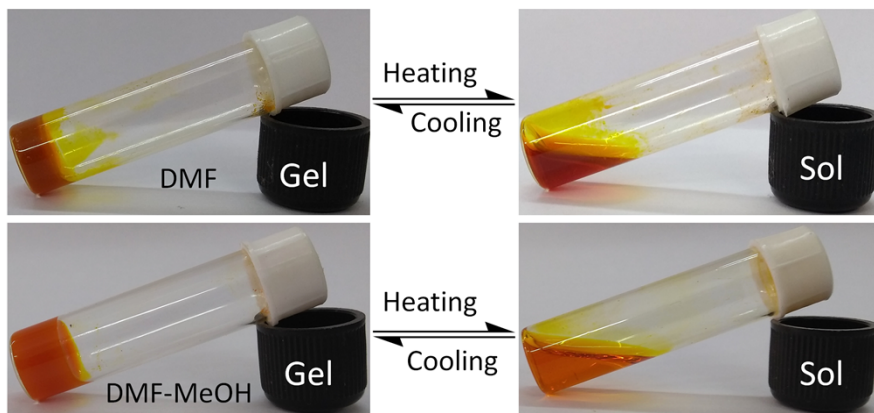

**Figure S1.** Thermo-reversibility of gel **1** [ $c = 6.1 \times 10^{-2}$  M (for DMF gel) and  $c = 1.2 \times 10^{-2}$  M (for DMF-MeOH gel)].

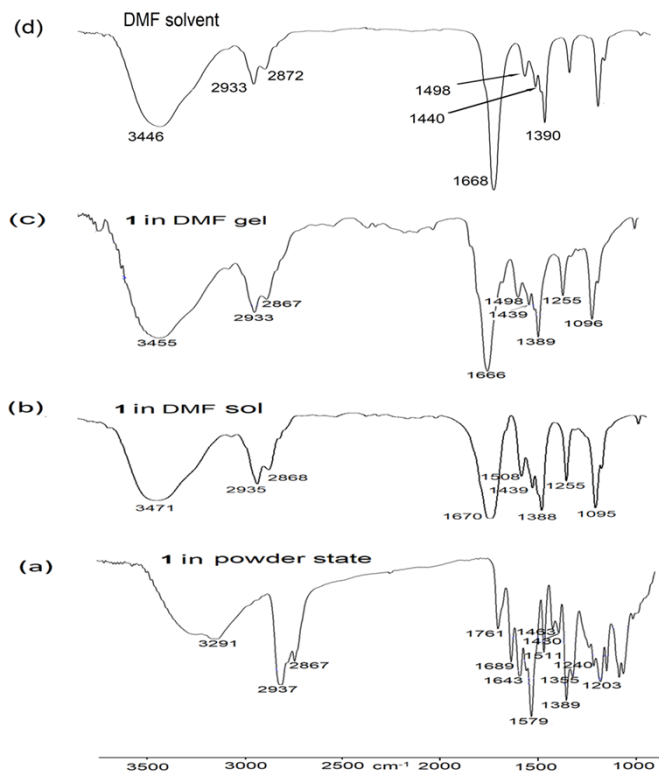

**Figure S2.** Comparison of FTIR spectra of **1** in the (a) powder, (b) solution and (c) gel state in DMF. In the series, (d) indicates the FTIR of DMF solvent.

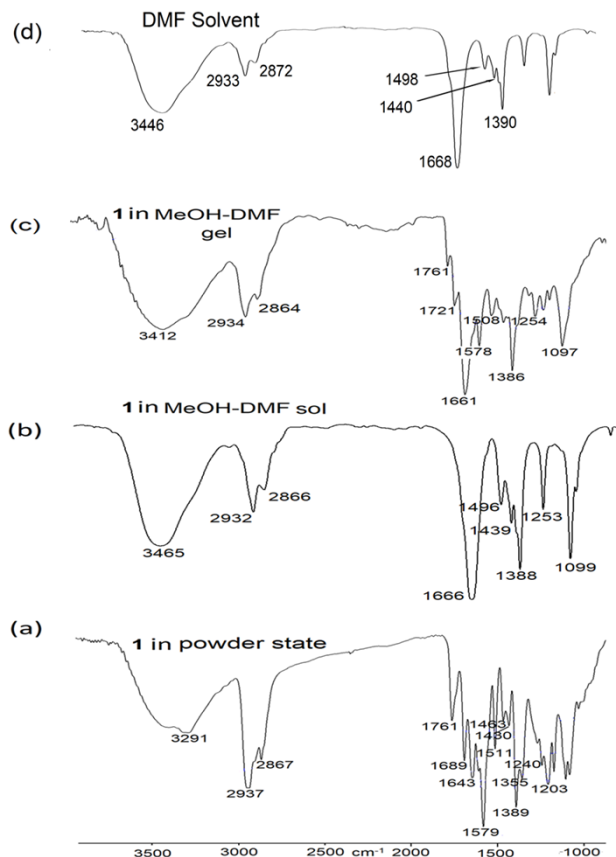

**Figure S3.** Comparison of FTIR spectra of **1** in (a) powder, (b) solution and (c) gel states in DMF-MeOH (1: 1, v/v). In the series, (d) indicates the FTIR of DMF solvent.

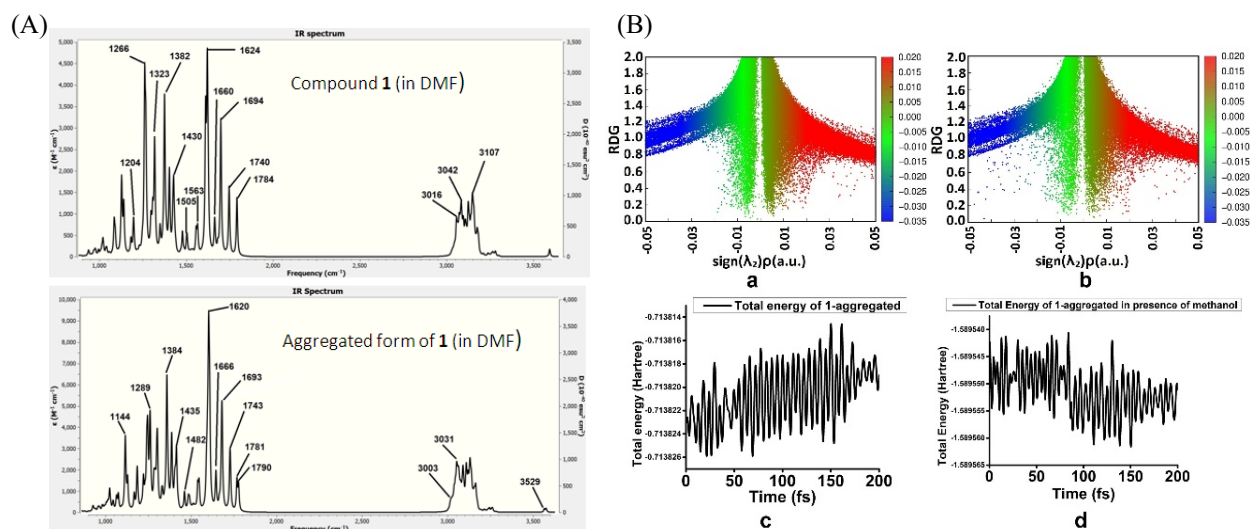

**Figure S4:** (A) Theoretical FTIR spectra of **1** and its aggregated form in DMF; (B) Reduced density gradient plots of **1**-aggregated form in (a) DMF, (b) DMF-CH<sub>3</sub>OH; ADMP trajectories of optimized geometry of **1**-aggregated form in (c) DMF and in presence of CH<sub>3</sub>OH.

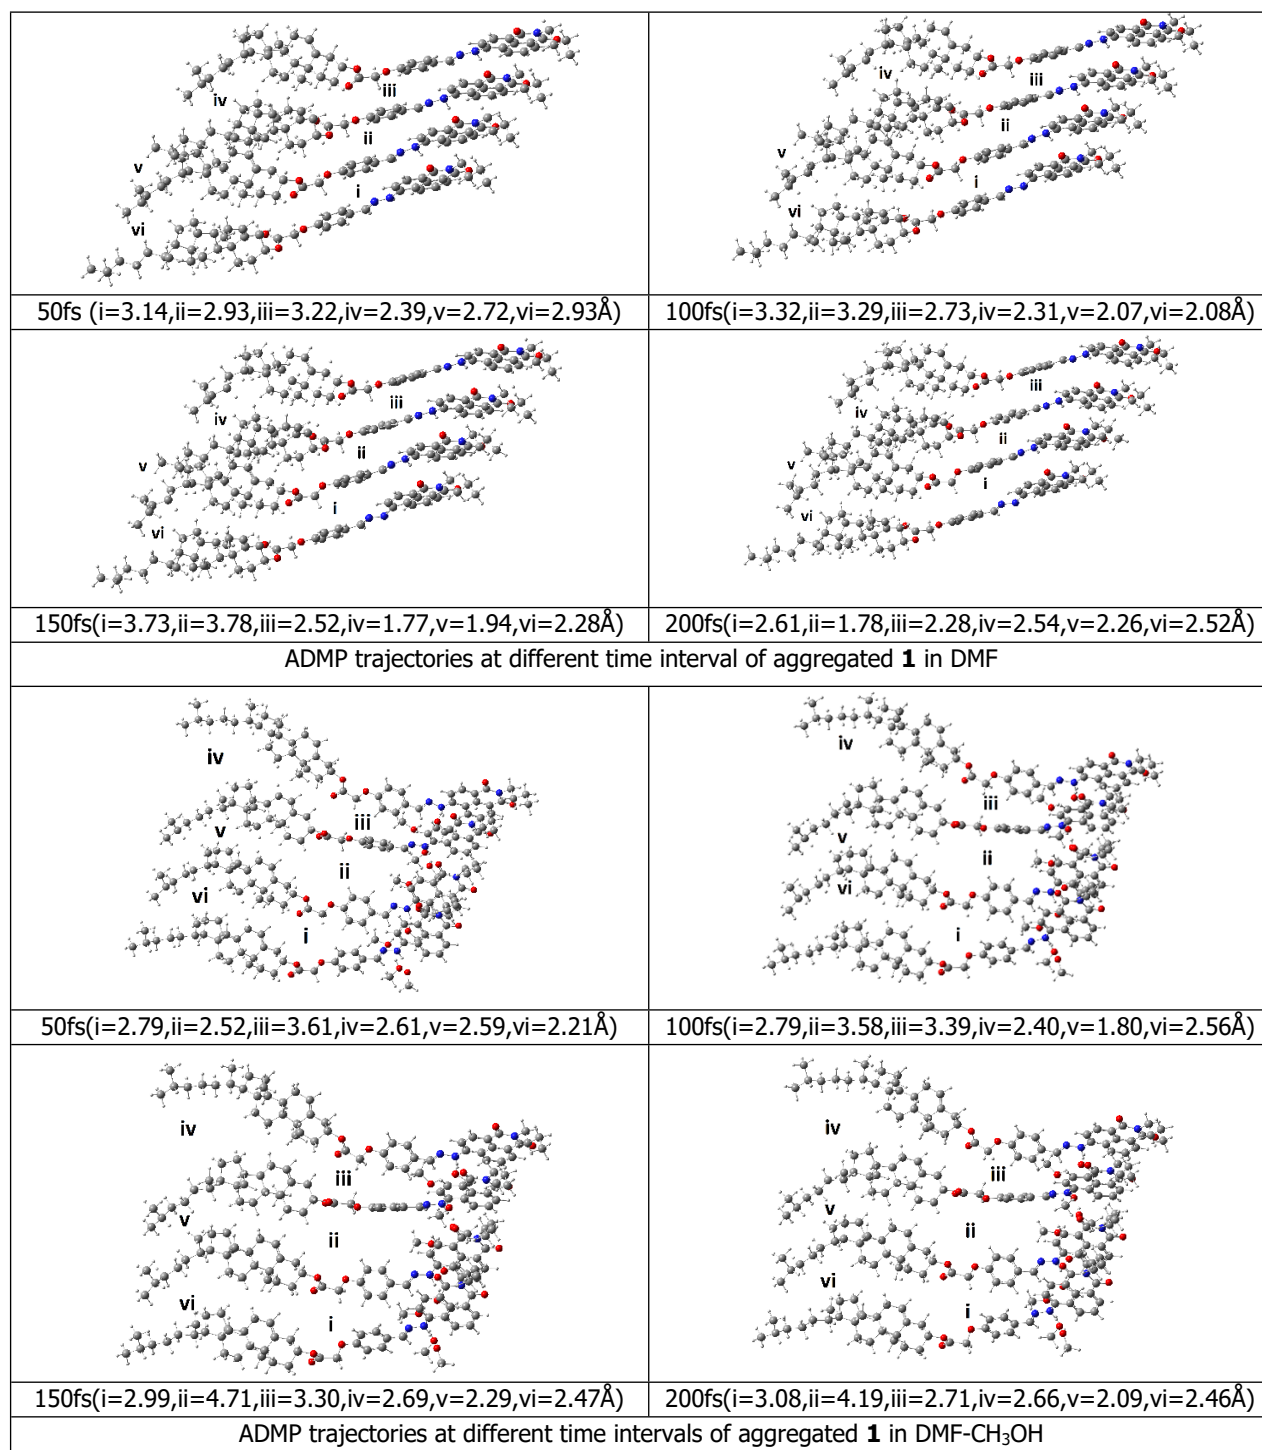

**Figure S5.** ADMP trajectories in vacuum at different time intervals of aggregated **1** of the optimized geometries in different solvents.

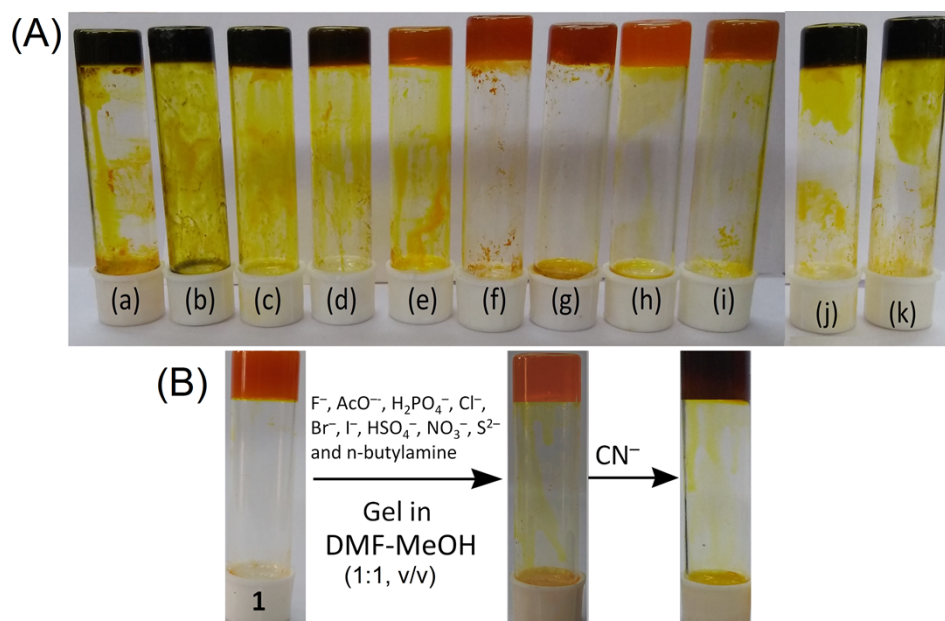

**Figure S6.** (A) Changes in the gel state of **1** ( $c = 6.1 \times 10^{-2}$  M) in DMF upon addition of 1 equiv. amount of different anions (as tetrabutylammonium salt) after 15 min [from left to right: (a)  $CN^-$ , (b)  $F^-$ , (c)  $AcO^-$ , (d)  $H_2PO_4^-$ , (e)  $Cl^-$ , (f)  $Br^-$ , (g)  $I^-$ , (h)  $HSO_4^-$ , (i)  $NO_3^-$ , (j)  $S^{2-}$  and (k) n-Butylamine]; (B) Selectivity for  $CN^-$  in presence of all other anions (gel concentration was  $1.2 \times 10^{-2}$  M).

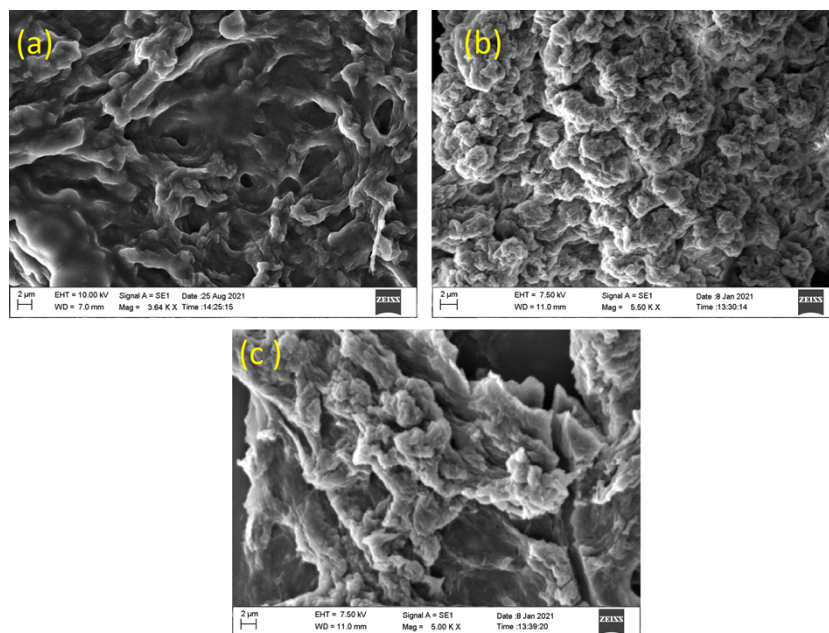

**Figure S7.** SEM images: (a) F-induced DMF gel (b)  $CN^-$ -induced DMF gel and  $CN^-$ - induced DMF- MeOH (1:1, v/v) gel of **1**.

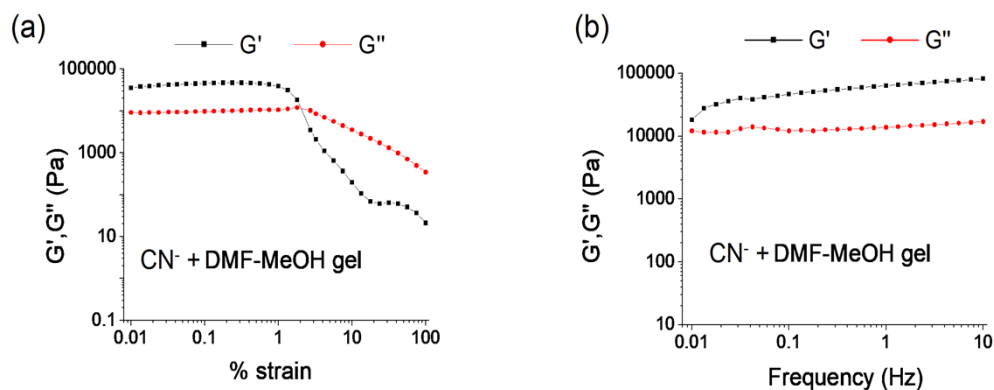

**Figure S8.** Rheology study of CN<sup>-</sup>-induced gel of **1**; (a) amplitude sweep (at constant frequency of 1 Hz) and (b) frequency sweep (at constant 0.5% strain) experiments [Gel was prepared at mgc ( $c = 1.2 \times 10^{-2}$  M) and the experiments were carried out at 25 °C].

**Table S2.** Summary of rheological properties of CN<sup>-</sup>-induced gel of **1**.

| Gel in Solvent                           | Critical strain (%) | Crossover (% strain) | $G'_{av}$ (Pa)* | $G''_{av}$ (Pa)* | $G''_{av}/G'_{av}$ |
|------------------------------------------|---------------------|----------------------|-----------------|------------------|--------------------|
| CN <sup>-</sup> -induced gel in DMF-MeOH | 0.74                | 2.03                 | 63660           | 14070            | 0.22               |

\* $G'_{av}$  and  $G''_{av}$  values were calculated from frequency sweep data

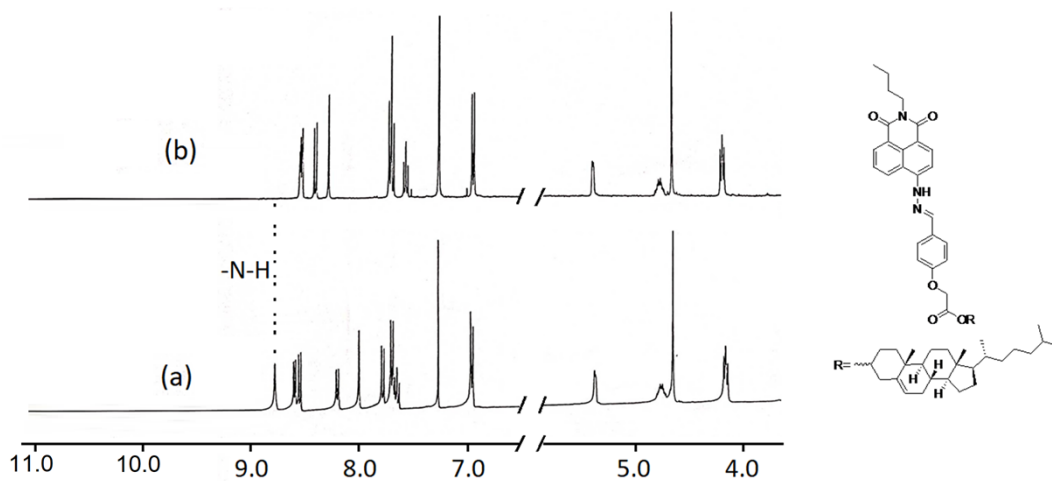

**Figure S9.** Partial <sup>1</sup>H NMR (400 MHz) of **1** ( $c = 4.9 \times 10^{-3}$  M) in the absence (a) and presence (b) of an equiv. amount of CN<sup>-</sup> ( $c = 0.245$  M) in CDCl<sub>3</sub>.

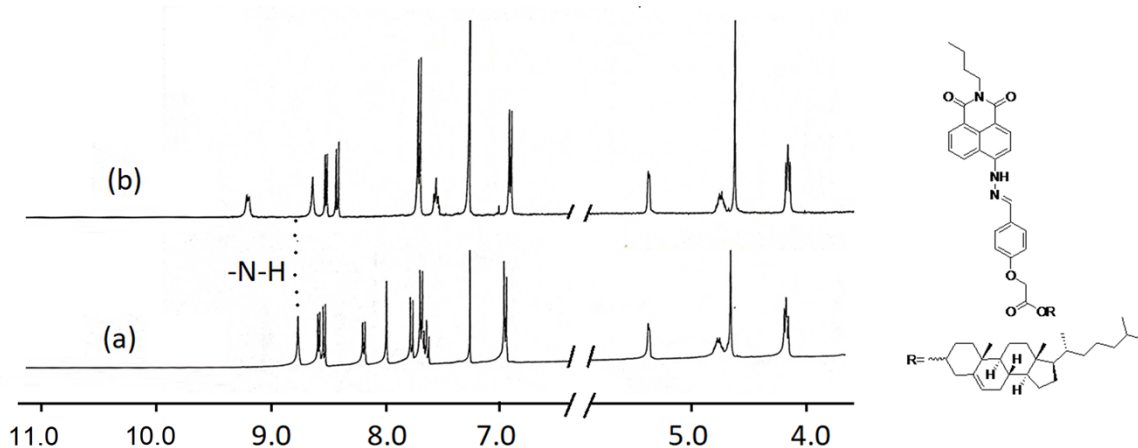

**Figure S10.** Partial  $^1\text{H}$  NMR (400 MHz) of **1** ( $c = 4.9 \times 10^{-3}$  M) in the absence (a) and presence (b) of an equiv. amount of  $\text{F}^-$  ( $c = 0.245$  M) in  $\text{CDCl}_3$ .

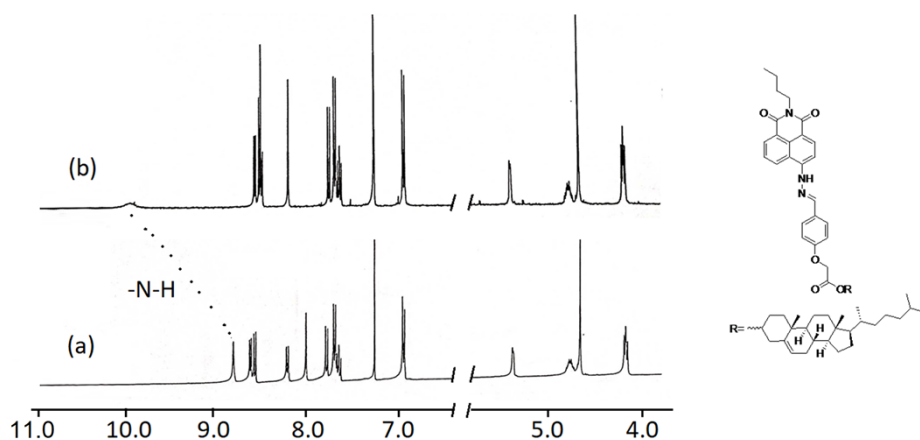

**Figure S11.** Partial  $^1\text{H}$  NMR (400 MHz) of **1** ( $c = 4.9 \times 10^{-3}$  M) in the absence (a) and presence (b) of an equiv. amount of  $\text{AcO}^-$  ( $c = 0.245$  M) in  $\text{CDCl}_3$ .

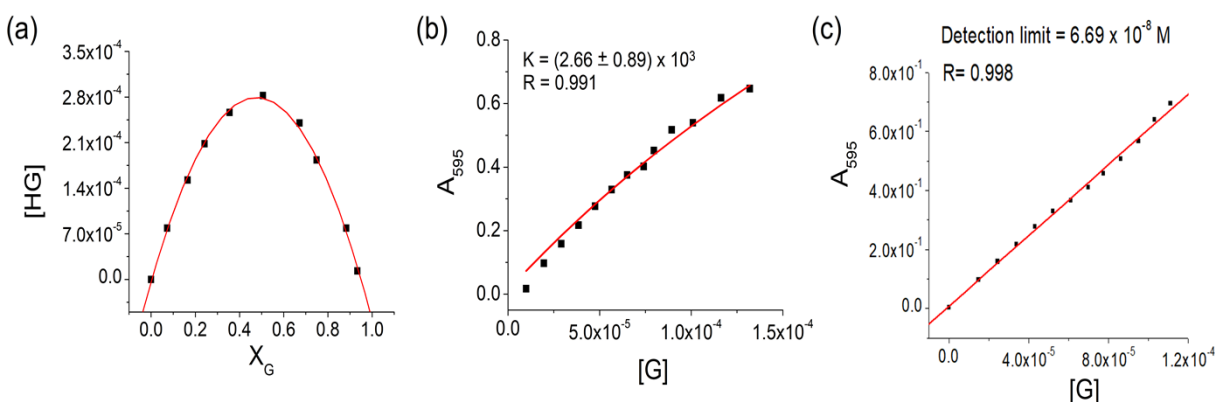

**Figure S12.** (a) UV-Vis Job's plot of receptor **1** with  $\text{CN}^-$ ; (b) Binding constant curve from non-linear fitting UV-Vis titration data and (c) detection limit for  $\text{CN}^-$  ( $c = 1.0 \times 10^{-3}$  M) with **1** ( $c = 2.5.0 \times 10^{-5}$  M) using the data at 595 nm from UV-vis titration in DMF.

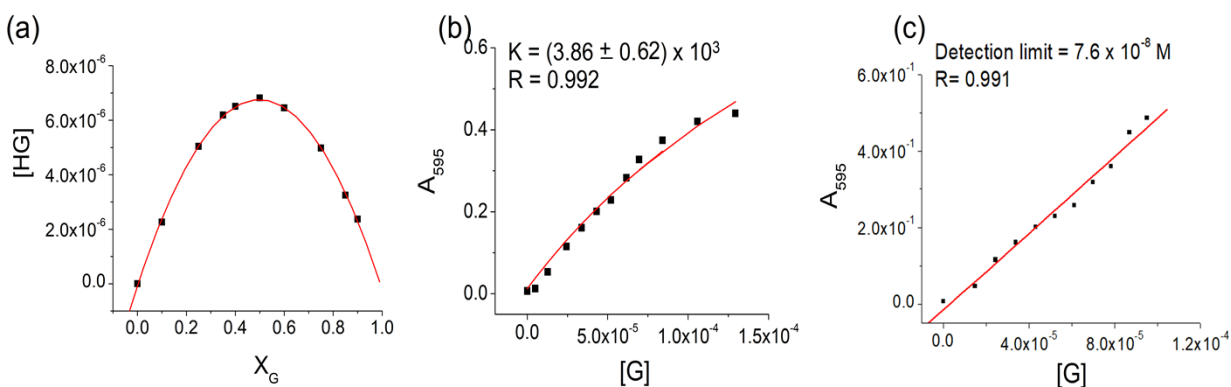

**Figure S13.** (a) UV-Vis Job's plot of receptor **1** with  $F^-$ ; (b) Binding constant curve from non-linear fitting UV-Vis titration data and (c) detection limit for  $F^-$  ( $c = 1.0 \times 10^{-3} \text{ M}$ ) with **1** ( $c = 2.50 \times 10^{-5} \text{ M}$ ) using the data at 595 nm from UV-vis titration in DMF.

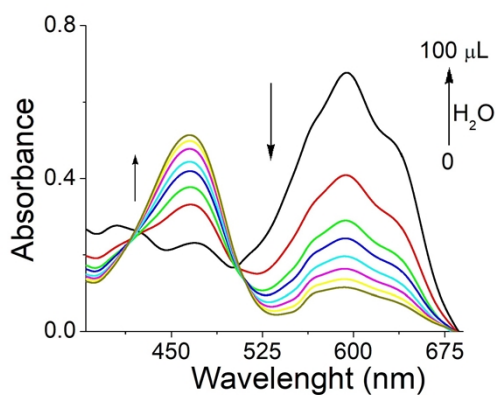

**Figure S14.** Change in absorbance of  $1.CN^-$  ensemble [prepared from addition of 6 equiv. of  $CN^-$  ( $c = 1.0 \times 10^{-3}$ ) to **1** ( $c = 2.50 \times 10^{-5} \text{ M}$ ) in DMF] upon addition of  $H_2O$ .

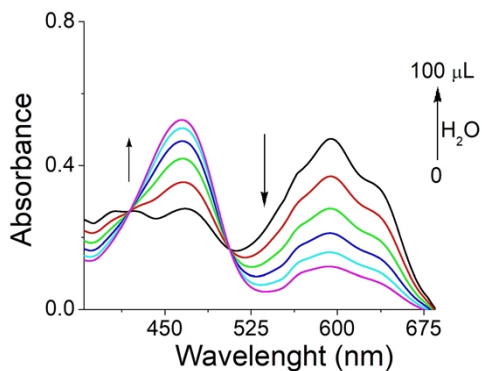

**Figure S15.** Change in absorbance of  $1.F^-$  ensemble [prepared from addition of 6 equiv. of  $F^-$  ( $c = 1.0 \times 10^{-3}$ ) to **1** ( $c = 2.50 \times 10^{-5} \text{ M}$ ) in DMF] upon addition of  $H_2O$ .



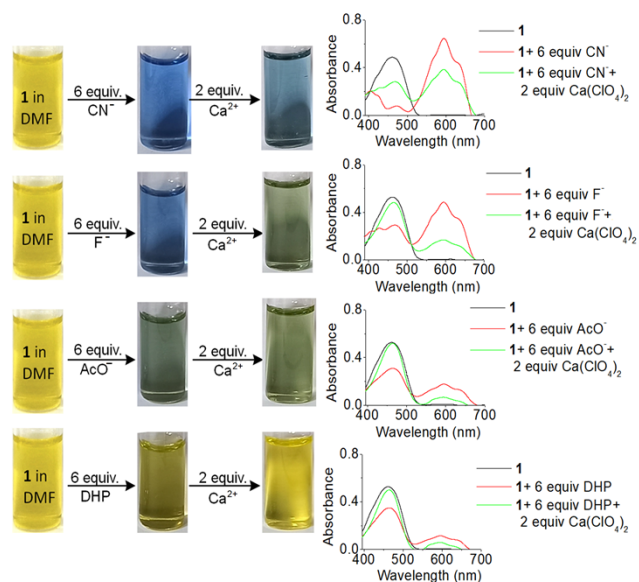

**Figure S16.** Change in colour of the solution of **1** ( $c = 2.50 \times 10^{-5}$  M) in DMF upon addition of 6 equiv. amounts of  $\text{CN}^-$ ,  $\text{F}^-$ ,  $\text{AcO}^-$  and  $\text{H}_2\text{PO}_4^-$  followed by addition of 2 equiv. amounts of  $\text{Ca}(\text{ClO}_4)_2$ .

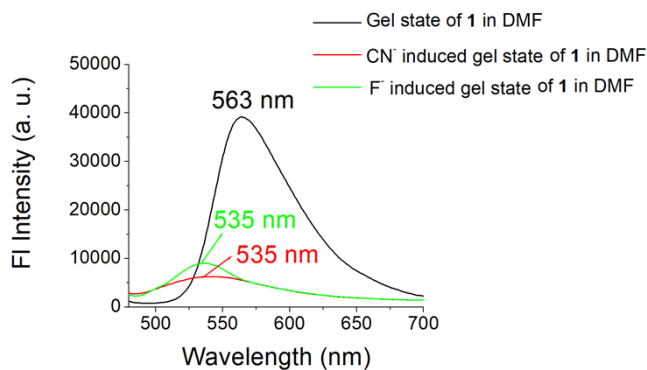

**Figure S17.** Emission change ( $\lambda_{\text{exc}} = 460$  nm) in gel state of **1** ( $c = 6.1 \times 10^{-2}$  M) in absence and presence of an equiv. amount of anions ( $\text{CN}^-$  and  $\text{F}^-$ ).

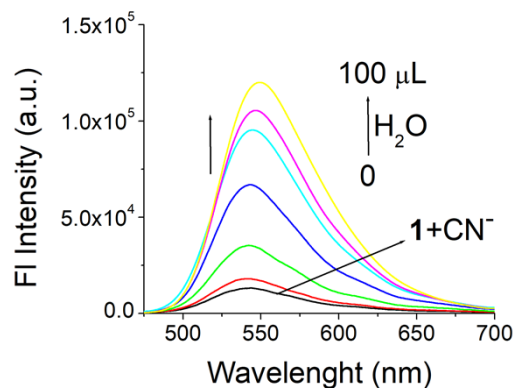

**Figure S18.** Change in emission of **1.CN<sup>-</sup>** ensemble [prepared from addition of 6 equiv. of  $\text{CN}^-$  ( $c = 1.0 \times 10^{-3}$ ) to **1** ( $c = 2.50 \times 10^{-5}$  M) in DMF] upon addition of  $\text{H}_2\text{O}$  ( $\lambda_{\text{exc}} = 460$  nm).

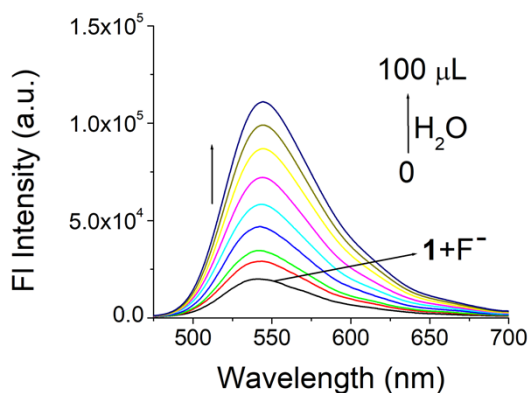

**Figure S19.** Change in absorbance of  $1.F^-$  ensemble [prepared from addition of 6 equiv. of  $F^-$  ( $c = 1.0 \times 10^{-3}$ ) to  $1$  ( $c = 2.50 \times 10^{-5}$  M) in DMF] upon addition of  $H_2O$  ( $\lambda_{exc} = 460$  nm).

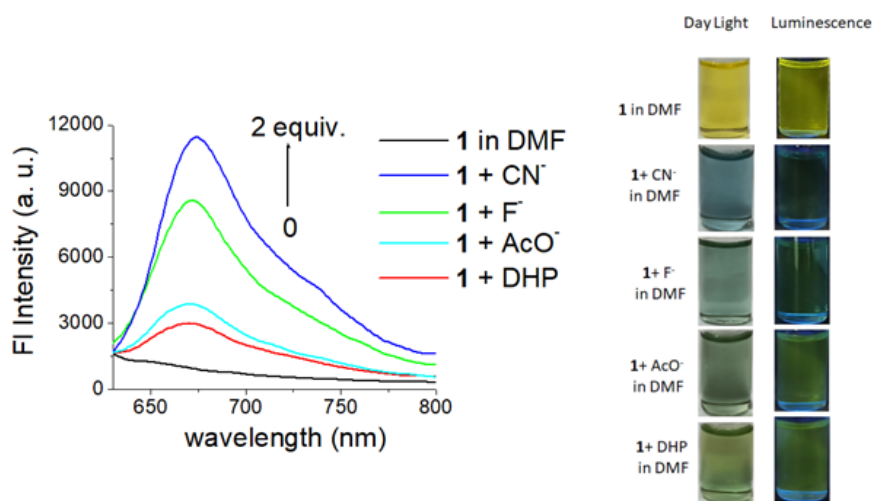

**Figure S20.** Change in emission of  $1$  ( $c = 2.50 \times 10^{-5}$  M) in DMF upon addition of different anions ( $c = 1.0 \times 10^{-3}$  M) ( $\lambda_{exc} = 595$  nm).

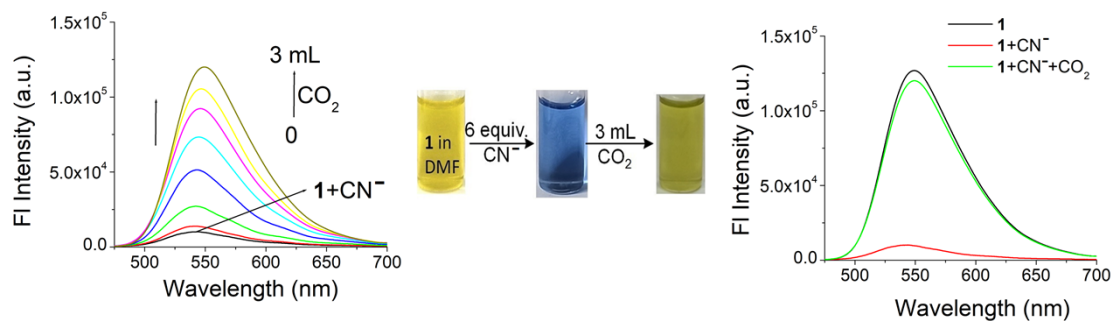

**Figure S21.** Change in absorbance of  $1.CN^-$  ensemble [prepared from addition of 6 equiv. of  $CN^-$  ( $c = 2.5 \times 10^{-3}$ ) to  $1$  ( $c = 2.50 \times 10^{-5}$  M) in DMF] upon bubbling of  $CO_2$ .

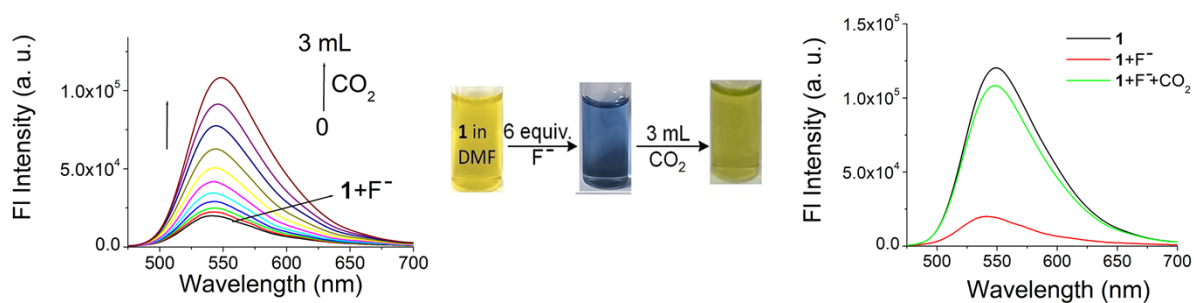

**Figure S22.** Change in absorbance of  $1 \cdot F^-$  ensemble [prepared from addition of 6 equiv. of  $F^-$  ( $c = 2.5 \times 10^{-3}$ ) to  $1$  ( $c = 2.50 \times 10^{-5}$  M) in DMF] upon bubbling of  $CO_2$ .

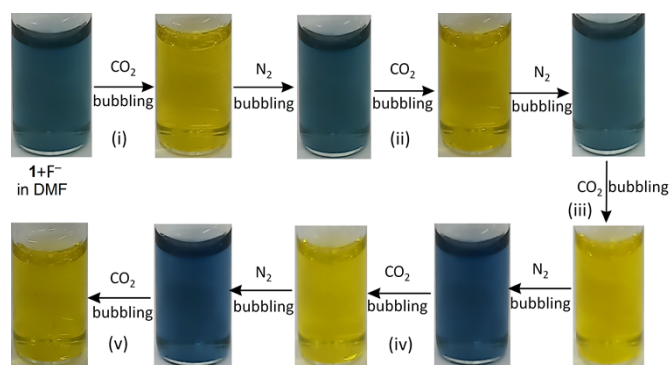

**Figure S23.** Pictorial representation of reversibility of gelator **1** in detection of  $CO_2$  gas.

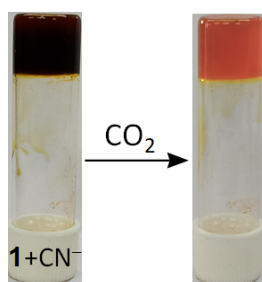

**Figure S24.** Detection of  $CO_2$  gas by  $CN^-$ -treated gel (DMF-MeOH; 1:1, v/v) of **1** ( $c = 1.2 \times 10^{-2}$  M).

**Table S3.** Reported structures for cyanide sensing in gel phase through deprotonation mechanism.

| Sl. No. | Structure                                                                           | Medium                               | Mode of interaction/<br>phase change        | Interference                          | Detection limits in solution study | Ref. no. |
|---------|-------------------------------------------------------------------------------------|--------------------------------------|---------------------------------------------|---------------------------------------|------------------------------------|----------|
| 1.      | 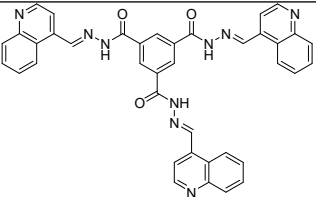   | DMSO/H <sub>2</sub> O<br>(1:1 v/v)   | Deprotonation<br>,<br>gel-to-sol transition | -                                     | 1.5 x 10 <sup>-6</sup> M           | 1        |
| 2.      |    | DMSO/H <sub>2</sub> O<br>(1:1 v/v)   | Deprotonation<br>,<br>gel-to-sol transition | F <sup>-</sup>                        | 7.96 x 10 <sup>-5</sup> M          | 2        |
| 3.      |    | glycerol                             | Deprotonation<br>,<br>gel-to-gel transition | Al <sup>3+</sup> and Fe <sup>3+</sup> | 3.02 x 10 <sup>-6</sup> M          | 3        |
| 4.      |   | THF                                  | Deprotonation<br>,<br>gel-to-sol transition | -                                     | 1.12 x 10 <sup>-5</sup> M          | 4        |
| 5.      |  | DMSO/H <sub>2</sub> O<br>(1:1 v/v)   | Deprotonation<br>,<br>gel-to-sol transition | -                                     | 3.68 x 10 <sup>-7</sup> M          | 5        |
| 6.      |  | n-BuOH/H <sub>2</sub> O<br>(9:1 v/v) | Deprotonation<br>,<br>gel-to-sol transition | S <sup>2-</sup>                       | 1.64 x 10 <sup>-8</sup> M          | 6        |

|     |  |                                    |                                                                            |                                                                                    |                           |             |
|-----|--|------------------------------------|----------------------------------------------------------------------------|------------------------------------------------------------------------------------|---------------------------|-------------|
| 7.  |  | DMSO                               | Deprotonation<br>,<br>gel-to-sol<br>transition                             | F <sup>-</sup> , AcO <sup>-</sup>                                                  | -                         | 7           |
| 8.  |  | DMSO-H <sub>2</sub> O              | H-bonding<br>followed by<br>deprotonation,<br><br>gel-to-gel<br>transition | F <sup>-</sup> , AcO <sup>-</sup> ,<br>H <sub>2</sub> PO <sub>4</sub> <sup>-</sup> | -                         | 8           |
| 9.  |  | DMF/H <sub>2</sub> O<br>(1/1, v/v) | Deprotonation                                                              | -                                                                                  | 5.53 x 10 <sup>-7</sup> M | 9           |
| 10. |  | DMF/MeOH<br>(1/1, v/v)             | Deprotonation<br><br>gel-to-gel<br>transition                              | -                                                                                  | 6.69 x 10 <sup>-8</sup> M | Our<br>work |

**Table S4.** Reported structures for CO<sub>2</sub> sensing in gel-sol medium.

| Sl. No. | Structure | Medium           | Solvent            | Ref. No. |
|---------|-----------|------------------|--------------------|----------|
| 13.     |           | solution         | CH <sub>3</sub> CN | 10       |
| 14.     |           | gel and solution | DMSO               | 11       |

|     |                                                                                                                                                                                                                                   |                  |                                          |     |
|-----|-----------------------------------------------------------------------------------------------------------------------------------------------------------------------------------------------------------------------------------|------------------|------------------------------------------|-----|
| 15. | 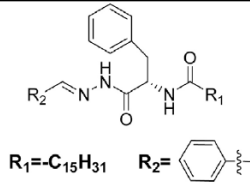 <p><math>R_1 = -C_{15}H_{31}</math>    <math>R_2 =</math> </p> | gel and solution | DMSO                                     | 12  |
| 16. |  <p><math>R = -(CH_2)_2O(CH_2)_2OH</math><br/> <math>R = -(CH_2)_2O(CH_2)_2O(C=O)CH_3</math></p>                                                 | gel and solution | DMSO                                     | 13. |
| 17. |                                                                                                                                                  | solution         | CH <sub>3</sub> CN containing 1%<br>DMSO | 14. |
| 18. |  <p><math>m = 3</math></p>                                                                                                                      | solution         | DMSO                                     | 15. |
| 19. |  <p><math>2PF_6^-</math></p>                                                                                                                   | solution         | CH <sub>3</sub> CN                       | 16. |

# $^1\text{H}$ NMR ( $\text{CDCl}_3$ , 400MHz)

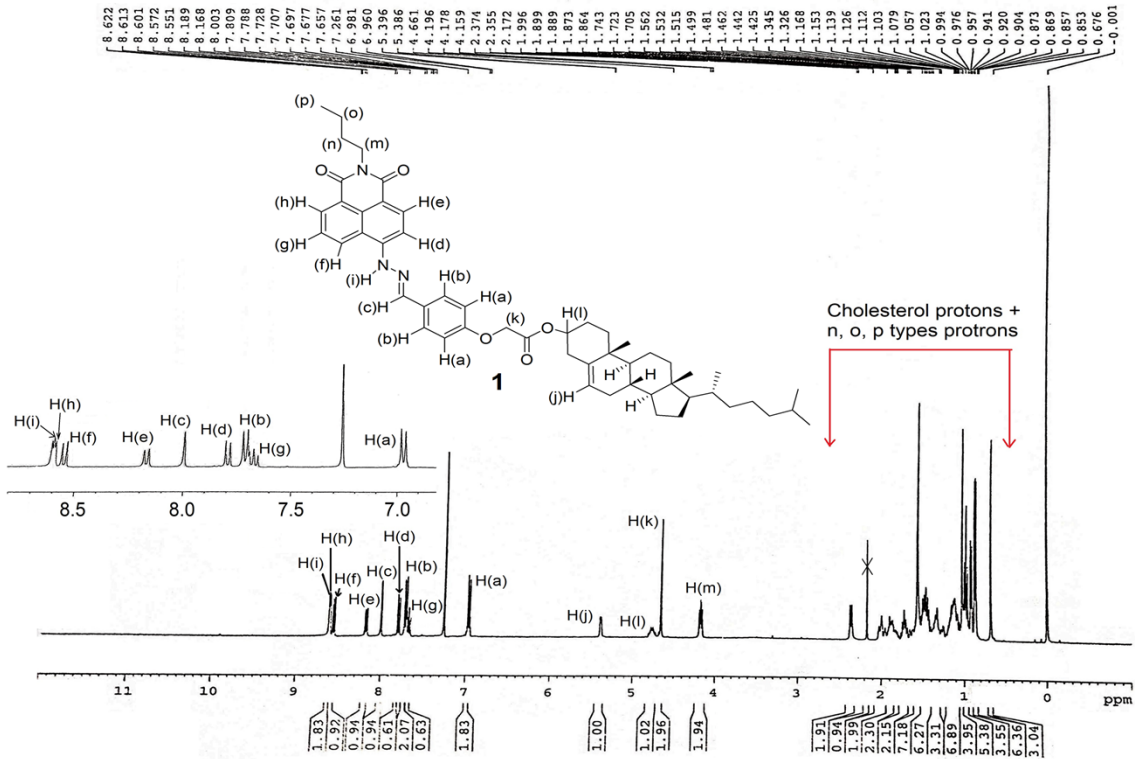

## COSY of **1** ( $\text{CDCl}_3$ , 400 MHz)

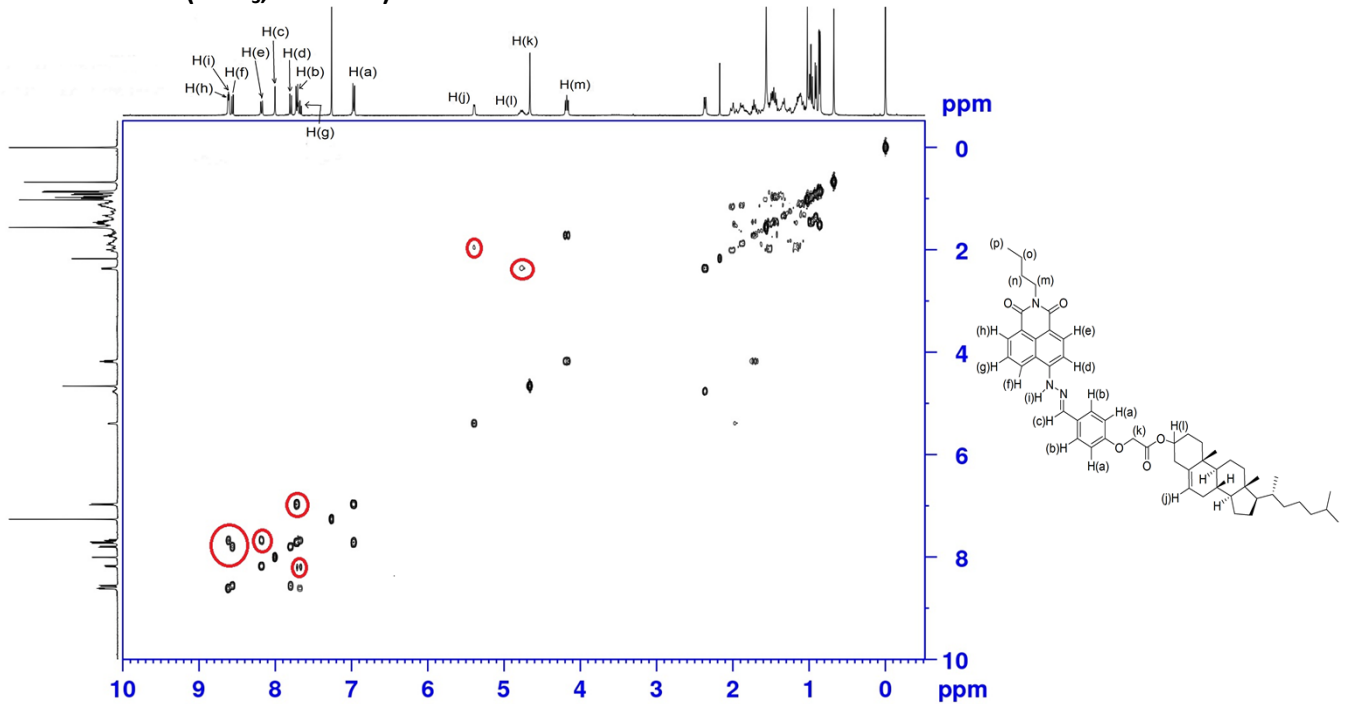





## References:

1. S. Sharma, M. Kumari, N. Singh, *Soft Matter.*, 2020, **16**, 6532–6538.
2. A. Panja, S. Ghosh and K. Ghosh, *New J. Chem.*, 2019, **43**, 10270–10277.
3. H. Yao, J. Wang, S.-S. Song, Y.-Q. Fan, X.-W. Guan, Q. Zhou, T.-B. Wei, Q. Lin and Y.-M. Zhang, *New J. Chem.*, 2018, **42**, 18059–18065.
4. S. K. Samanta, N. Dey, N. Kumari, D. Biswakarma and S. Bhattacharya, *ACS Sustainable Chem. Eng.*, 2019, **7**, 12304–12314.
5. B. Sarkar, P. Prabakaran, E. Prasad and R. L. Gardas, *ACS Sustainable Chem. Eng.*, 2020, **8**, 8327–8337.
6. J.-H. Hu, Z.-Y. Yin, K. Gui, Q.-Q. Fu, Y. Yao, X.-M. Fu and H.-X. Liu, *Soft Matter*, 2020, **16**, 1029–1033.
7. K. Ghosh and C. Pati, *Tetrahedron Lett.*, 2016, **57**, 5469-5474.
8. S.-N. Li, B. Li, L.-X. Gong, Z.-R. Yu, Y. Feng, D. Jia, Y. Zhou, L.-C. Tang, *Mater. Des.*, 2019, **162**, 162–170.
9. S. Ghosh, P. Jana and K. Ghosh, *Anal. Methods*, 2021, **13**, 695–702.
10. M. Lee, S. Jo, D. Lee, Z. Xu and J. Yoon, *Dyes Pigm.*, 2015, **120**, 288-192.
11. X. Zhang, Y. Song, M. Liu, H. Li, H. Sun, M. Sun and H. Yu, *Dyes Pigm.*, 2019, **160**, 799-805.
12. X. Zhang, H. Mu, H. Li, Y. Zhang, M. An, X. Zhang, J. Yoon and H. Yu, *Sensors and Actuators B: Chemical*, 2018, **255**, 2764-2778.
13. X. Zhang, H. Li, H. Mu, Y. Liu, Y. Guan, J. Yoon and H. Yu, *Dyes Pigm.*, 2017, **147**, 40-49.
14. C. Pati, R. Raza and K. Ghosh, *Spectrochim. Acta A*, 2020, **229**, 117910.
15. T. Gunnlaugsson, P. E. Kruger, P. Jensen, F. M Pfeffer and G.M.Hussey, *Tetrahedron Lett.*, 2003, **44**, 8909e13.
16. Z. Guo, N.R. Song, J.H. Moon, M. Kim, E.J. Jun, J. Choi, J. Y. Lee, C. W. Bielawski, J. L. Sessler, and J. Yoon, *J Am Chem Soc.*, 2012, **134**, 17846e9.
